# Supplementary material for: Small Molecule Inhibitors Targeting Nuclear Factor κB Activation Markedly Reduce Expression of Interleukin-2, but Not Interferon-γ, Induced by Phorbol Esters and Calcium Ionophores
Source: MDPI journal article supplement (doi:10.3390/ijms222313098), 2021-12-03
Supplement: s1 [file s1]

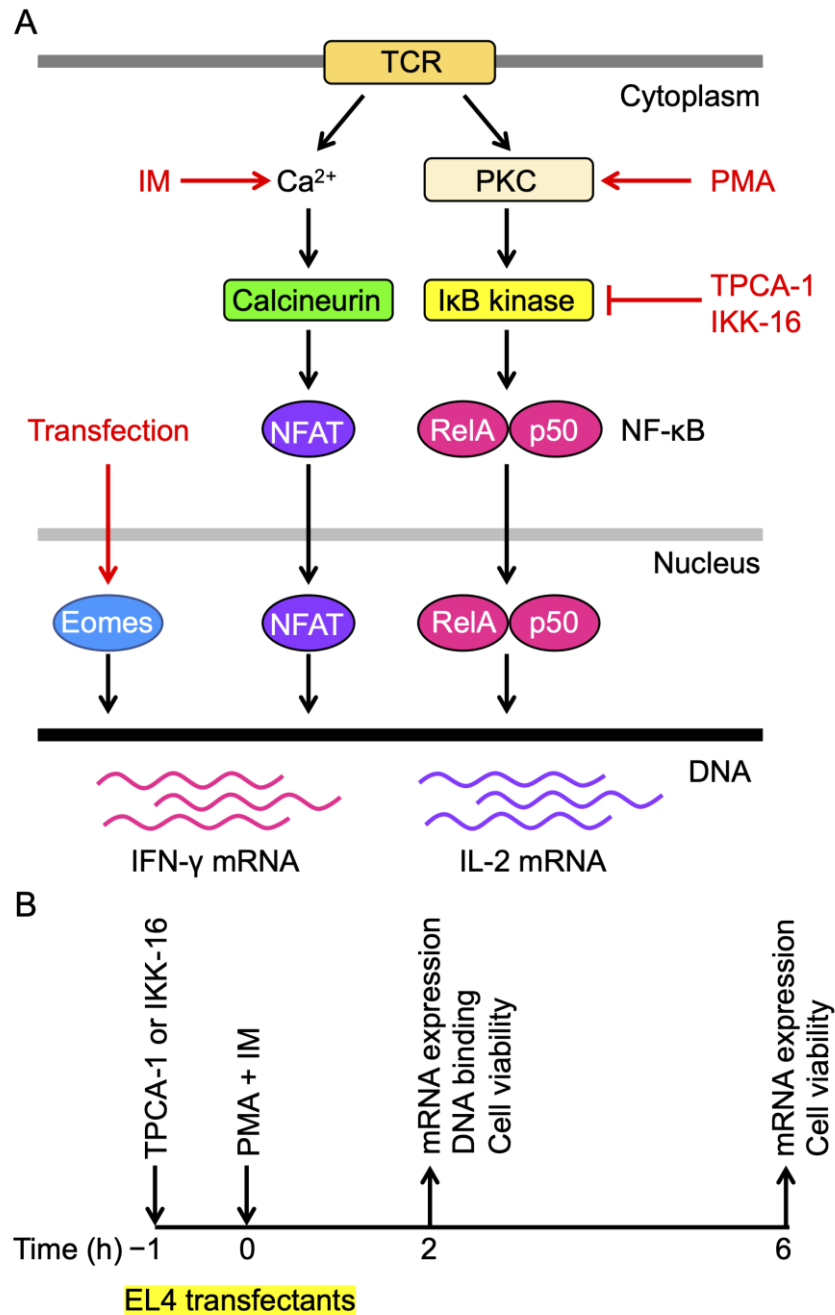

**Figure S1.** A schematic of TCR-induced signaling pathways and the experimental design for EL4 transfectants. (A) The TCR stimulation induces the activation of protein kinase C (PKC) and augments the level of intracellular  $\text{Ca}^{2+}$ , which ultimately promotes the transcription of cytokines, such as IFN- $\gamma$  and IL-2. NF- $\kappa$ B and NFAT are transcription factors that are activated upon a TCR stimulation. PMA and IM are used to mimic the TCR stimulation. PMA activates PKC, and ultimately induces the activation of I $\kappa$ B kinase, which phosphorylates I $\kappa$ B, leading

to its proteasomal degradation and the liberation of NF- $\kappa$ B heterodimers, such as those consisting of RelA and p50. IM is a calcium ionophore that increases the level of intracellular  $\text{Ca}^{2+}$ , and thereby activates calcineurin, which dephosphorylates NFAT isoforms, allowing their translocation to the nucleus. TPCA-1 and IKK-16 inhibit I $\kappa$ B kinase in the NF- $\kappa$ B signaling pathway. Mouse lymphoma EL4 cells were stably transfected with an expression vector encoding Eomes or a control expression vector. (B) EL4 transfectants were pretreated with TPCA-1 or IKK-16 for 1 h, and then treated with or without PMA (10 nM) plus IM (1  $\mu$ M) for the indicated times in the presence or absence of TPCA-1 or IKK-16 to measure mRNA expression, DNA binding, or cell viability.

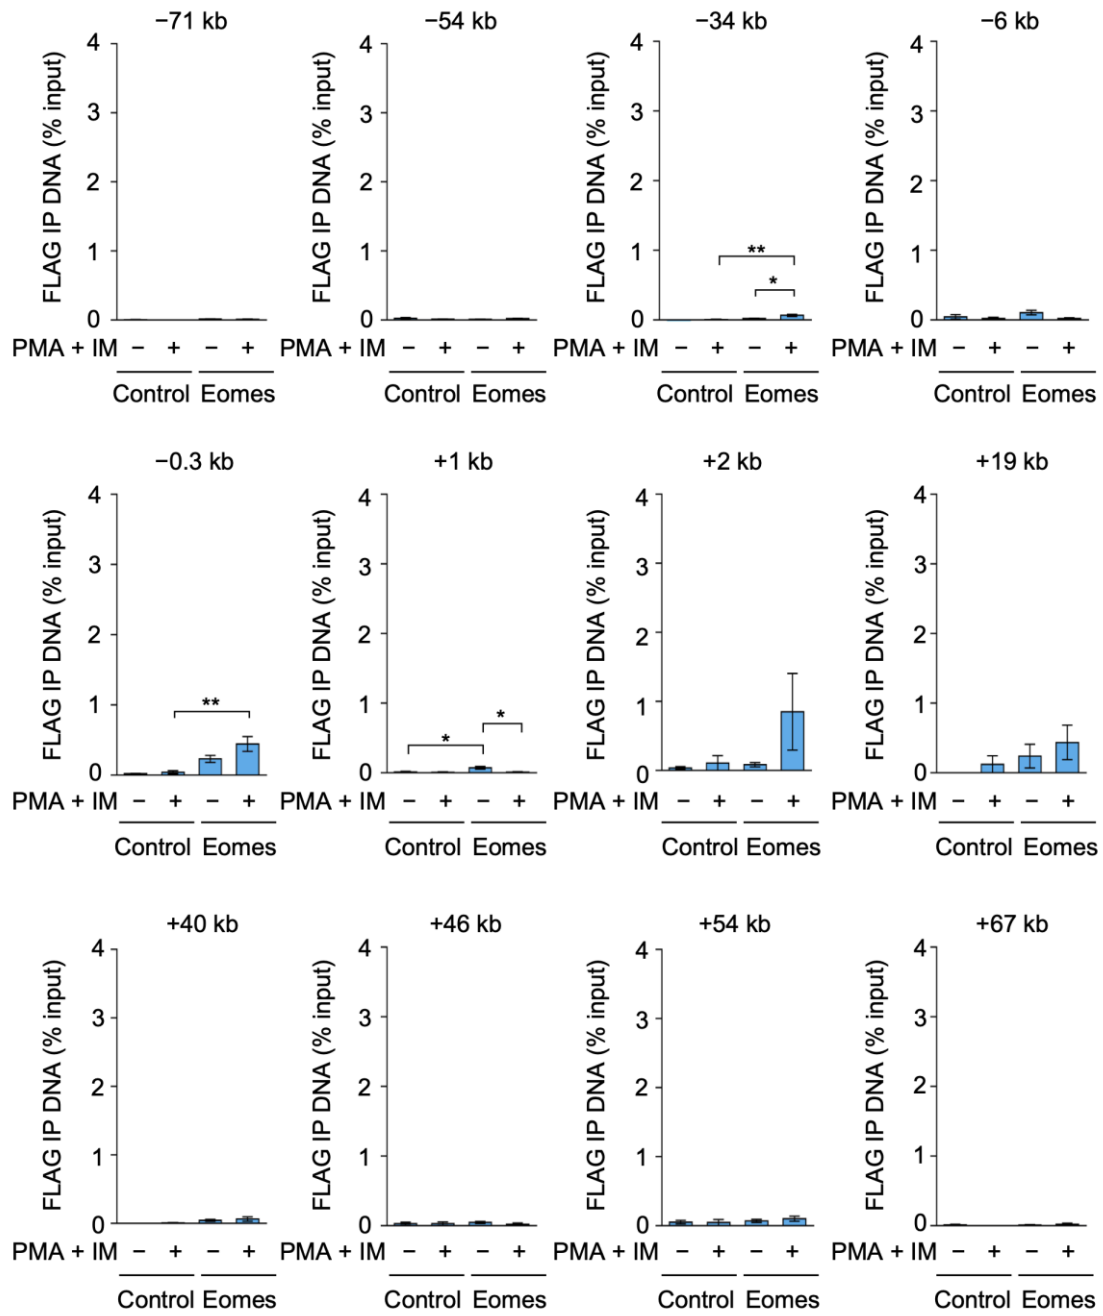

**Figure S2.** Binding of FLAG-Eomes to specific regions across the IFN- $\gamma$  locus in EL4 transfectants. Regarding experimental details and other regions, refer to Figure 2A.

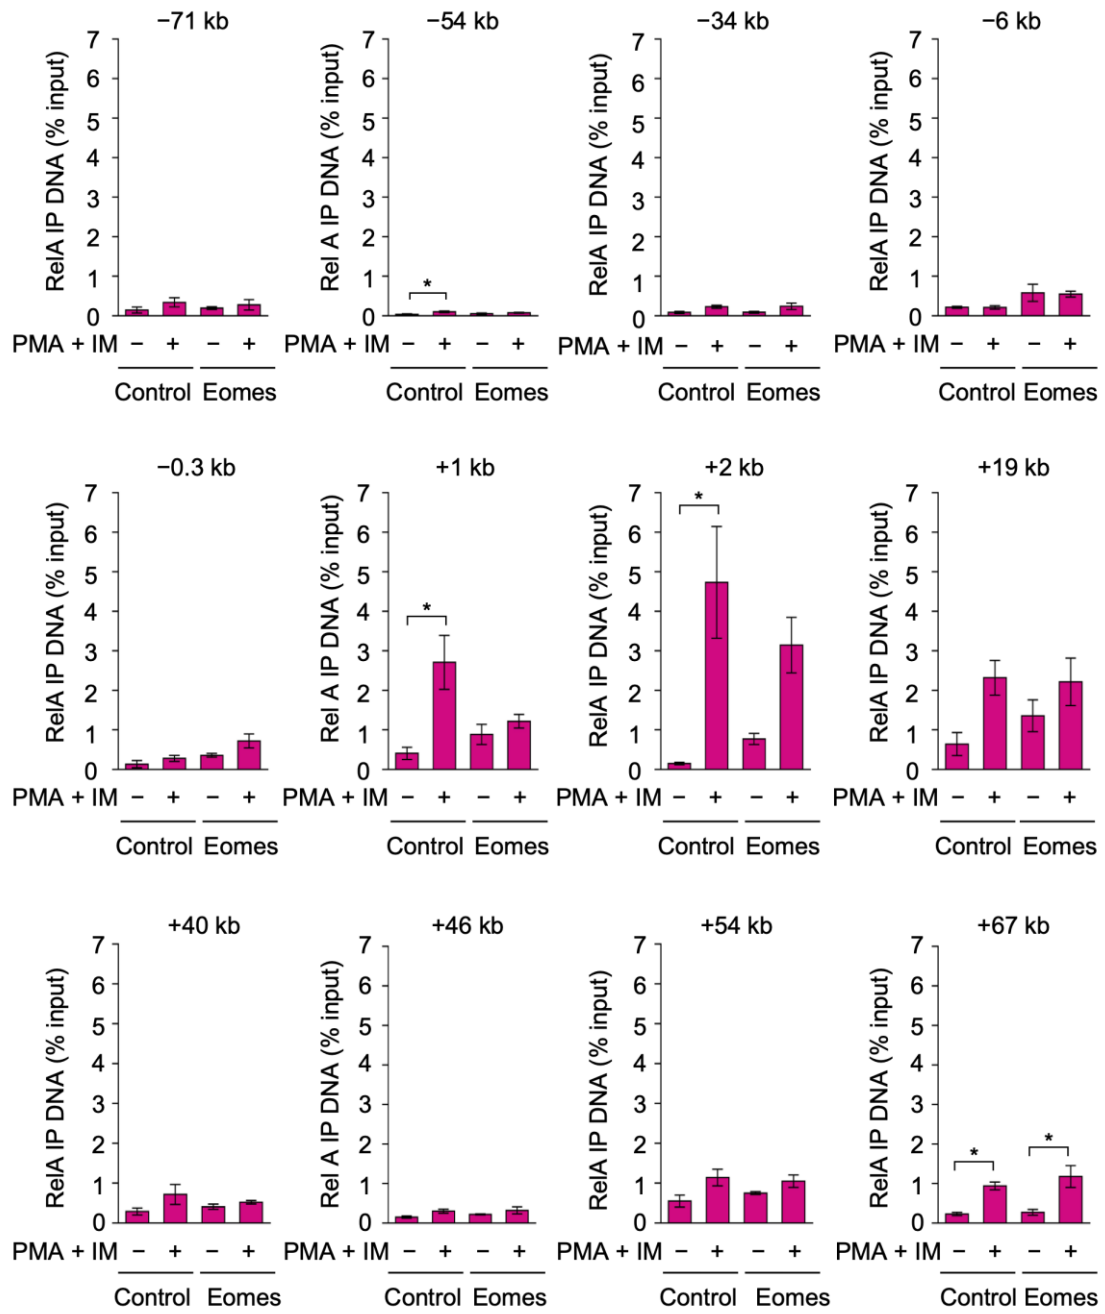

**Figure S3.** Binding of RelA to specific regions across the IFN- $\gamma$  locus in EL4 transfectants.

Regarding experimental details and other regions, refer to Figure 2B.

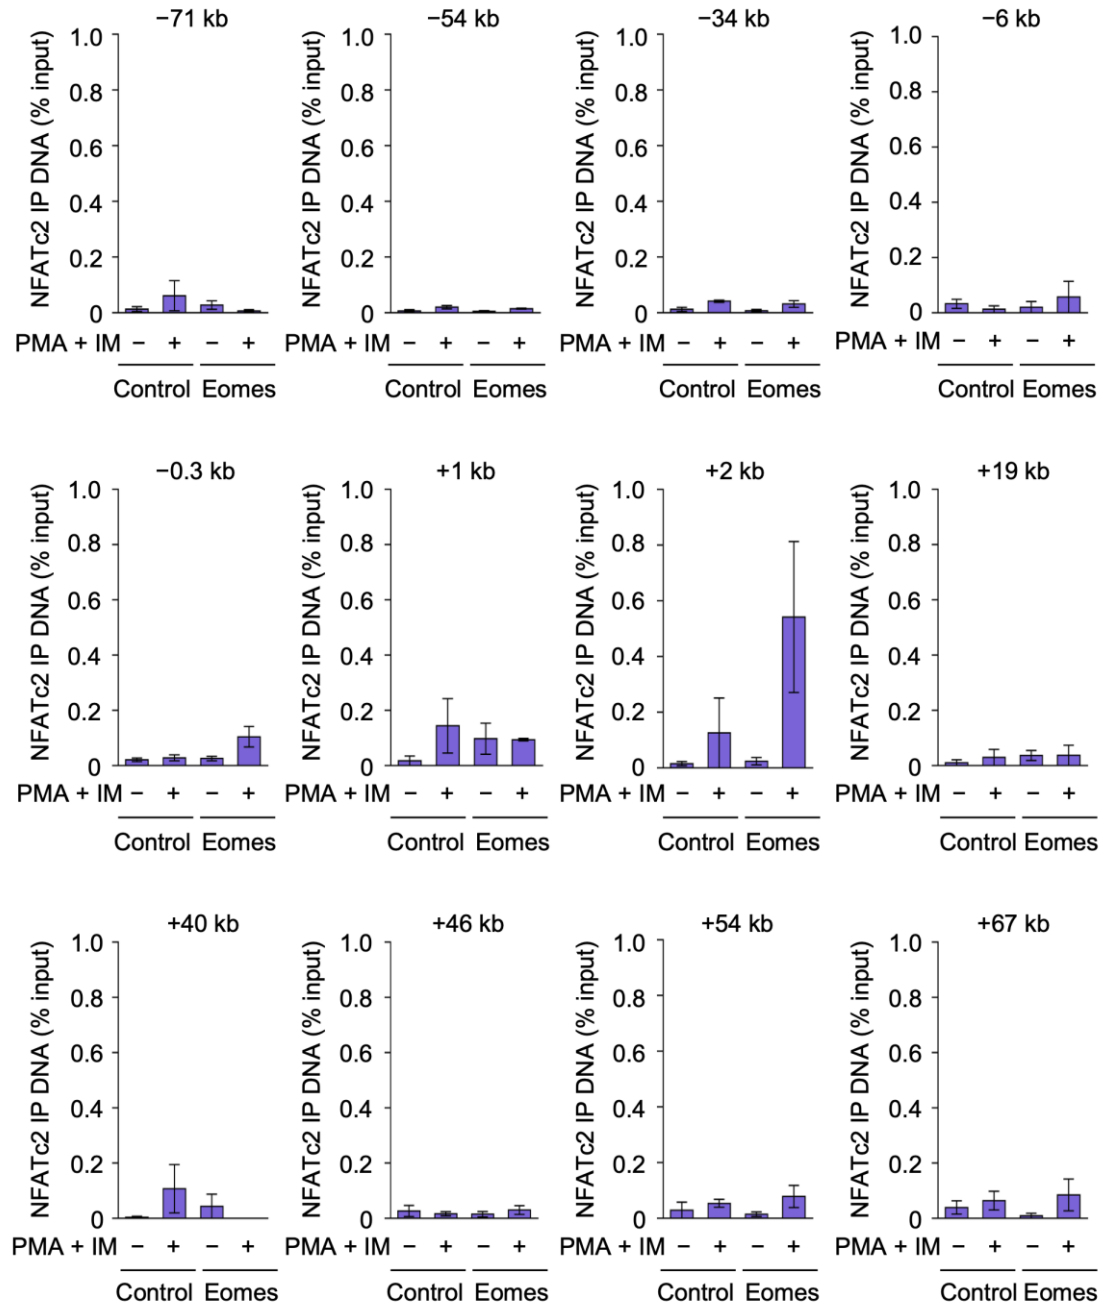

**Figure S4.** Binding of NFATc2 to specific regions across the IFN- $\gamma$  locus in EL4 transfectants. Regarding experimental details and other regions, refer to Figure 2C.

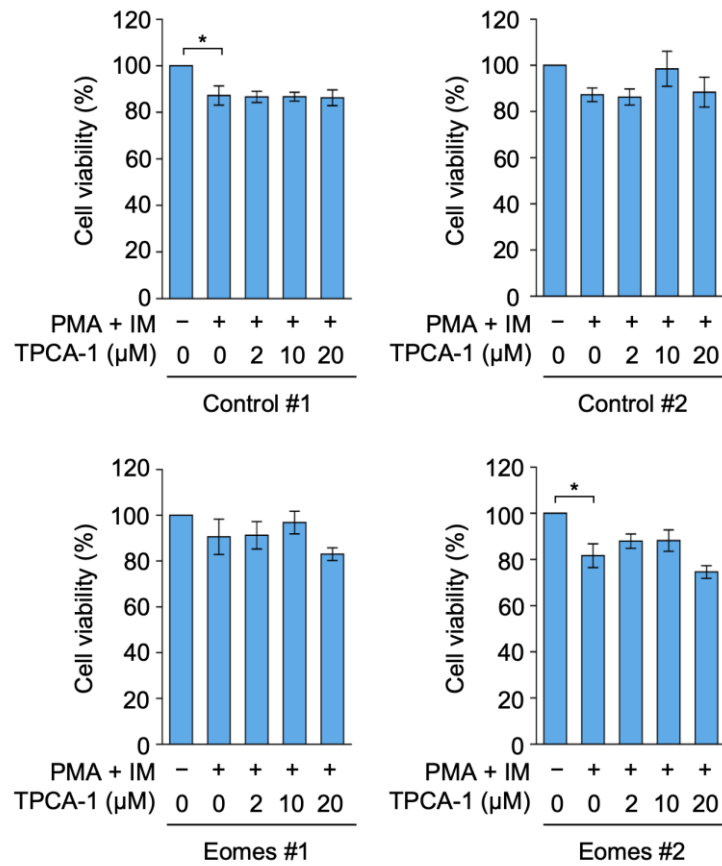

**Figure S5.** Effects of TPCA-1 on the cell viability of EL4 transfectants. Control #1, Control #2, Eomes #1, and Eomes #2 EL4 transfectants were pretreated with TPCA-1 for 1 h, and then treated with (+) or without (–) PMA (10 nM) and IM (1 μM) for 6 h in the presence or absence of TPCA-1 at the indicated final concentrations. Cell viability (%) is shown as the mean  $\pm$  S.E. of three independent experiments. \* $P < 0.05$ .

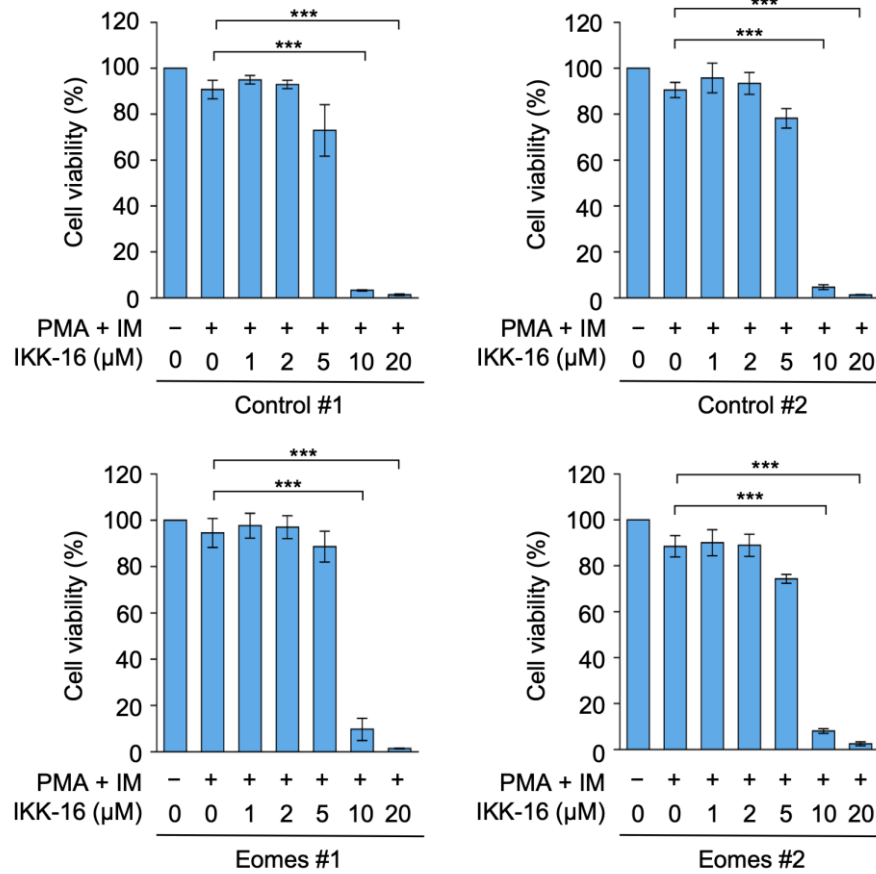

**Figure S6.** Effects of IKK-16 on the cell viability of EL4 transfectants. Control #1, Control #2, Eomes #1, and Eomes #2 EL4 transfectants were pretreated with IKK-16 for 1 h, and then treated with (+) or without (-) PMA (10 nM) and IM (1 μM) for 6 h in the presence or absence of IKK-16 at the indicated final concentrations. Cell viability (%) is shown as the mean ± S.E. of three independent experiments. \*\*\* $P < 0.001$ .

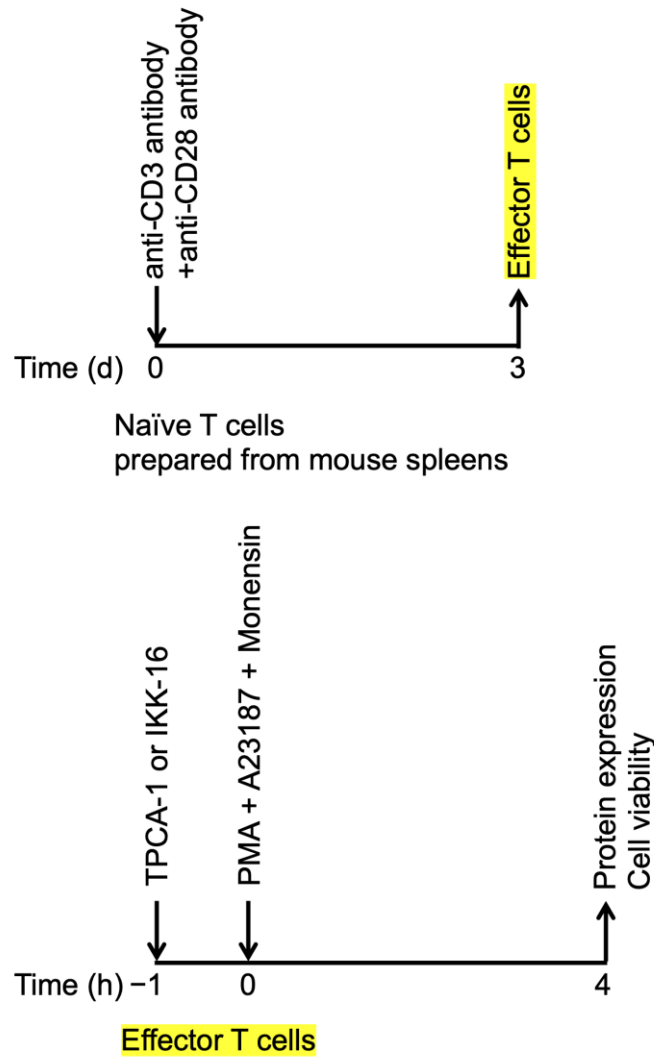

**Figure S7.** Experimental design for primary effector T cells. Naïve T cells were prepared from mouse spleens and incubated in plates coated with an anti-CD3 antibody (10  $\mu\text{g/mL}$ ) and anti-CD28 antibody (2  $\mu\text{g/mL}$ ) for 3 d. Effector T cells were harvested and preincubated with TPCA-1 or IKK-16 for 1 h, followed by an incubation with PMA (20  $\text{ng/mL}$ ) and A23187 (0.5  $\mu\text{g/mL}$ ) to mimic a TCR stimulation and monensin (2  $\mu\text{M}$ ) to block the secretion of cytokines for 4 h in the presence or absence of TPCA-1 or IKK-16. Cells were analyzed for the cell surface expression of CD4 and CD8 $\alpha$  and intracellular expression of IFN- $\gamma$  and IL-2 by flow cytometry.
